# Supplementary material
Source: bioRxiv or medRxiv preprint supplement (https://medrxiv.org/highwire/filestream/71501/field_highwire_adjunct_files/1/2020.01.24.20018648-2.pdf)
Supplement: Supplementary file [file 2020.01.24.20018648-2.pdf]

| Supplemental Table 2. Spearman's rank correlation for N= 43 with ASD between SRS, SPSRQ-C, resting pupil PD, $A_D$ , and $A_C$ |                               |                               |                                   |                                   |                                   |                                   |                                   |                                   |                                   |                               |                               |                 |                                   |           |
|--------------------------------------------------------------------------------------------------------------------------------|-------------------------------|-------------------------------|-----------------------------------|-----------------------------------|-----------------------------------|-----------------------------------|-----------------------------------|-----------------------------------|-----------------------------------|-------------------------------|-------------------------------|-----------------|-----------------------------------|-----------|
|                                                                                                                                | Age                           | FSIQ                          | SRS Total                         | SRS SCI                           | RBRI                              | Social Awr                        | Social Cog                        | Social Com                        | Social Mot                        | SPSRQ-C Punish                | SPSRQ-C Reward                | Resting PD      | $A_D$                             | $A_C$     |
| Age                                                                                                                            | 1.00<br>-                     |                               |                                   |                                   |                                   |                                   |                                   |                                   |                                   |                               |                               |                 |                                   |           |
| FSIQ                                                                                                                           | -0.163<br>0.278               | 1.00<br>-                     |                                   |                                   |                                   |                                   |                                   |                                   |                                   |                               |                               |                 |                                   |           |
| SRS Total                                                                                                                      | -0.045<br>0.766               | <b>0.000</b><br><b>0.998</b>  | 1.00<br>-                         |                                   |                                   |                                   |                                   |                                   |                                   |                               |                               |                 |                                   |           |
| SRS SCI                                                                                                                        | -0.067<br>0.654               | <b>-0.006</b><br><b>0.967</b> | <b>0.983</b><br><b>&lt;0.0001</b> | 1.00<br>-                         |                                   |                                   |                                   |                                   |                                   |                               |                               |                 |                                   |           |
| RBRI                                                                                                                           | 0.024<br>0.875                | <b>-0.014</b><br><b>0.928</b> | <b>0.877</b><br><b>&lt;0.0001</b> | <b>0.790</b><br><b>&lt;0.0001</b> | 1.00<br>-                         |                                   |                                   |                                   |                                   |                               |                               |                 |                                   |           |
| Social Awr                                                                                                                     | -0.107<br>0.472               | <b>0.057</b><br><b>0.711</b>  | <b>0.732</b><br><b>&lt;0.0001</b> | <b>0.764</b><br><b>&lt;0.0001</b> | <b>0.570</b><br><b>&lt;0.0001</b> | 1.00<br>-                         |                                   |                                   |                                   |                               |                               |                 |                                   |           |
| Social Cog                                                                                                                     | 0.032<br>0.831                | <b>-0.167</b><br><b>0.273</b> | <b>0.854</b><br><b>&lt;0.0001</b> | <b>0.868</b><br><b>&lt;0.0001</b> | <b>0.679</b><br><b>&lt;0.0001</b> | <b>0.616</b><br><b>&lt;0.0001</b> | 1.00<br>-                         |                                   |                                   |                               |                               |                 |                                   |           |
| Social Com                                                                                                                     | -0.019<br>0.900               | <b>0.036</b><br><b>0.812</b>  | <b>0.955</b><br><b>&lt;0.0001</b> | <b>0.974</b><br><b>&lt;0.0001</b> | <b>0.763</b><br><b>&lt;0.0001</b> | <b>0.746</b><br><b>&lt;0.0001</b> | <b>0.931</b><br><b>&lt;0.0001</b> | 1.00<br>-                         |                                   |                               |                               |                 |                                   |           |
| Social Mot                                                                                                                     | -0.190<br>0.201               | <b>0.014</b><br><b>0.925</b>  | <b>0.804</b><br><b>&lt;0.0001</b> | <b>0.796</b><br><b>&lt;0.0001</b> | <b>0.709</b><br><b>&lt;0.0001</b> | <b>0.534</b><br><b>&lt;0.0001</b> | <b>0.541</b><br><b>&lt;0.0001</b> | <b>0.727</b><br><b>&lt;0.0001</b> | 1.00<br>-                         |                               |                               |                 |                                   |           |
| SPSRQ-C Punish                                                                                                                 | -0.019<br>0.901               | 0.143<br>0.359                | <b>0.537</b><br><b>&lt;0.0001</b> | <b>0.550</b><br><b>&lt;0.0001</b> | <b>0.376</b><br><b>0.012</b>      | <b>0.432</b><br><b>0.003</b>      | <b>0.527</b><br><b>&lt;0.0001</b> | <b>0.486</b><br><b>0.001</b>      | <b>0.573</b><br><b>&lt;0.0001</b> | 1.00<br>-                     |                               |                 |                                   |           |
| SPSRQ-C Reward                                                                                                                 | <b>-0.313</b><br><b>0.039</b> | 0.145<br>0.355                | <b>0.307</b><br><b>0.043</b>      | <b>0.332</b><br><b>0.028</b>      | 0.176<br>0.253                    | <b>0.300</b><br><b>0.048</b>      | <b>0.378</b><br><b>0.011</b>      | 0.264<br>0.083                    | <b>0.313</b><br><b>0.039</b>      | <b>0.464</b><br><b>0.002</b>  | 1.00<br>-                     |                 |                                   |           |
| Resting PD                                                                                                                     | -0.147<br>0.330               | 0.088<br>0.566                | 0.190<br>0.212                    | 0.178<br>0.242                    | 0.213<br>0.160                    | 0.019<br>0.900                    | 0.214<br>0.158                    | 0.135<br>0.377                    | 0.255<br>0.091                    | 0.232<br>0.139                | <b>0.437</b><br><b>0.004</b>  | 1.00<br>-       |                                   |           |
| $A_D$                                                                                                                          | 0.150<br>0.324                | -0.006<br>0.969               | <b>-0.329</b><br><b>0.029</b>     | <b>-0.332</b><br><b>0.028</b>     | -0.239<br>0.118                   | -0.247<br>0.106                   | -0.169<br>0.272                   | <b>-0.313</b><br><b>0.038</b>     | <b>-0.441</b><br><b>0.003</b>     | -0.300<br>0.057               | -0.298<br>0.059               | 0.021<br>0.889  | 1.00<br>-                         |           |
| $A_C$                                                                                                                          | 0.134<br>0.381                | 0.052<br>0.739                | <b>-0.322</b><br><b>0.033</b>     | <b>-0.309</b><br><b>0.041</b>     | 0.224<br>0.143                    | -0.254<br>0.097                   | -0.151<br>0.328                   | -0.279<br>0.067                   | <b>-0.400</b><br><b>0.007</b>     | <b>-0.438</b><br><b>0.004</b> | <b>-0.414</b><br><b>0.007</b> | -0.265<br>0.078 | <b>0.711</b><br><b>&lt;0.0001</b> | 1.00<br>- |
